# Supplementary material
Source: PubMed Central journal article supplement (PMC6432790)

Figure 1. Sites of action of phospholipase enzymes and nature of products of phospholipase A<sub>2</sub> action

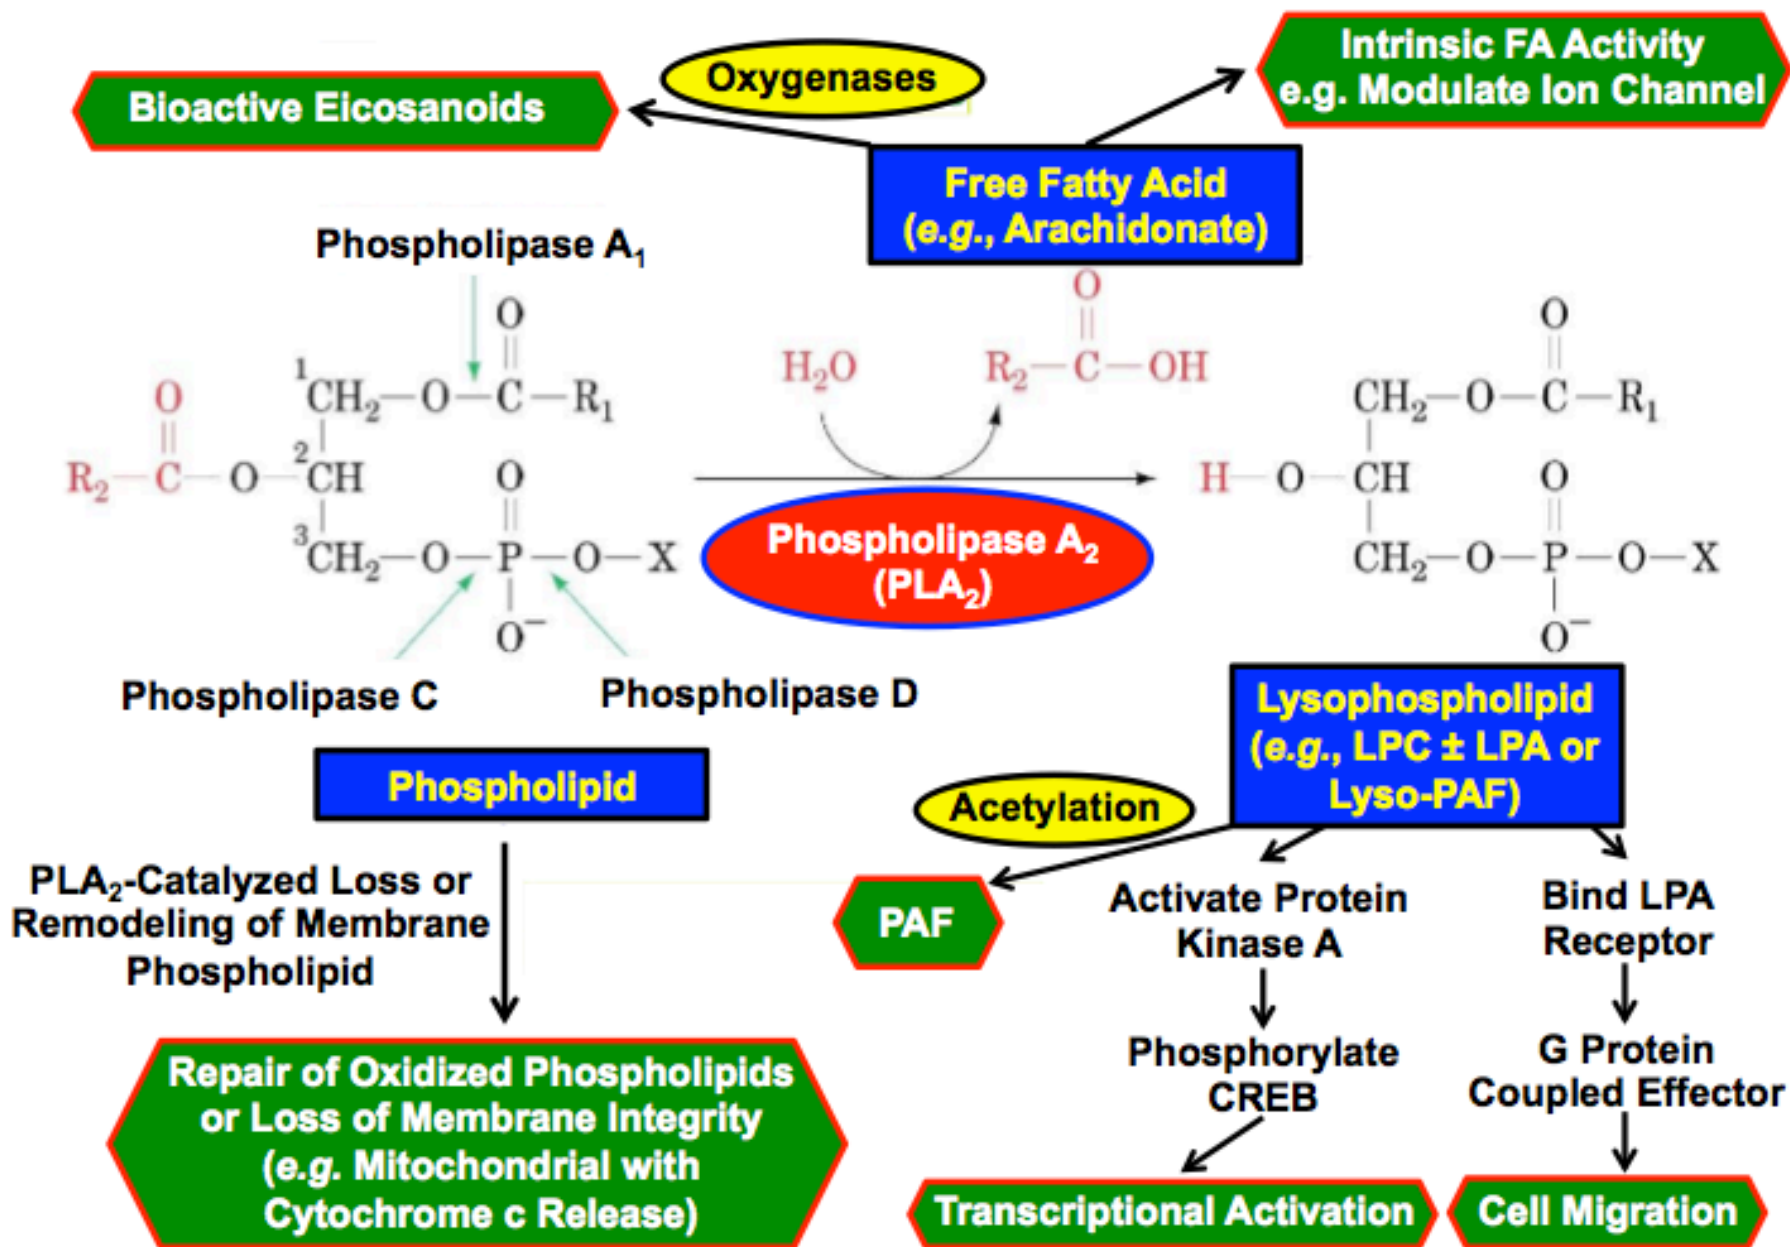

Figure 2. Schematic diagram of iPLA<sub>2</sub>β pre-mRNA and transcripts derived from it by alterative splicing.

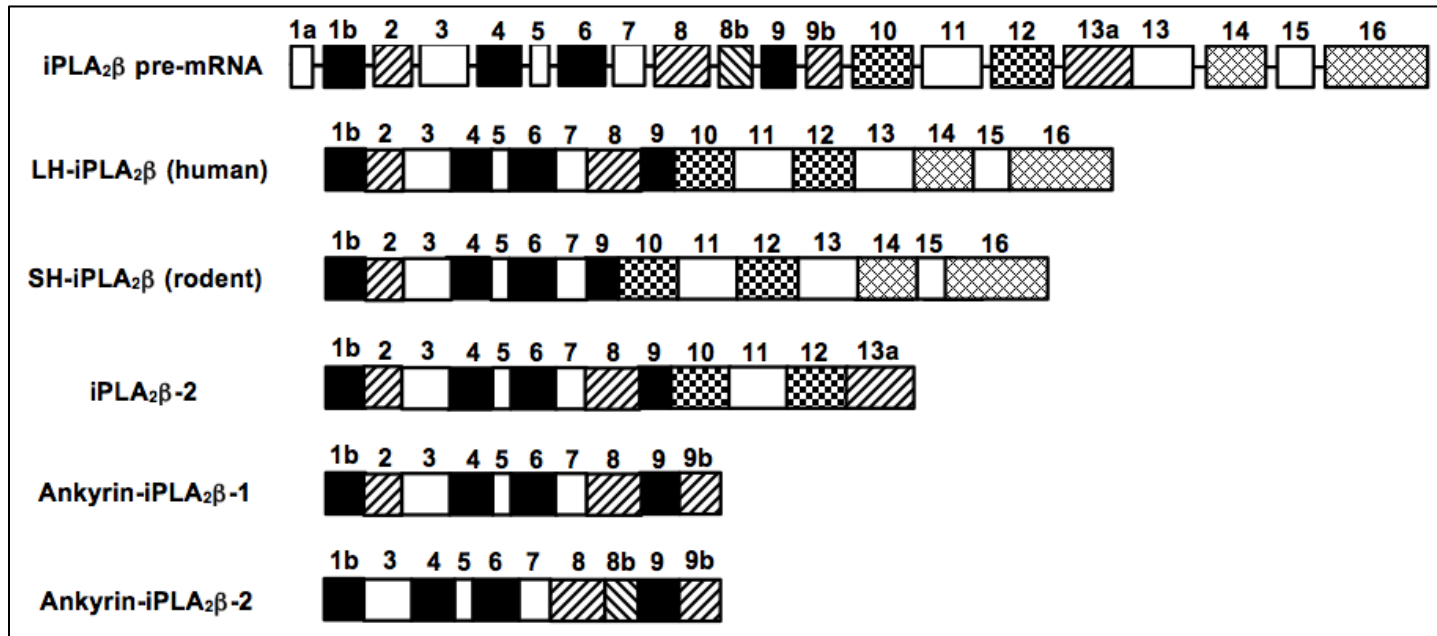

Figure 3. Participation of iPLA<sub>2</sub>b-Derived Lipids in Metabolic and Inflammatory Processes

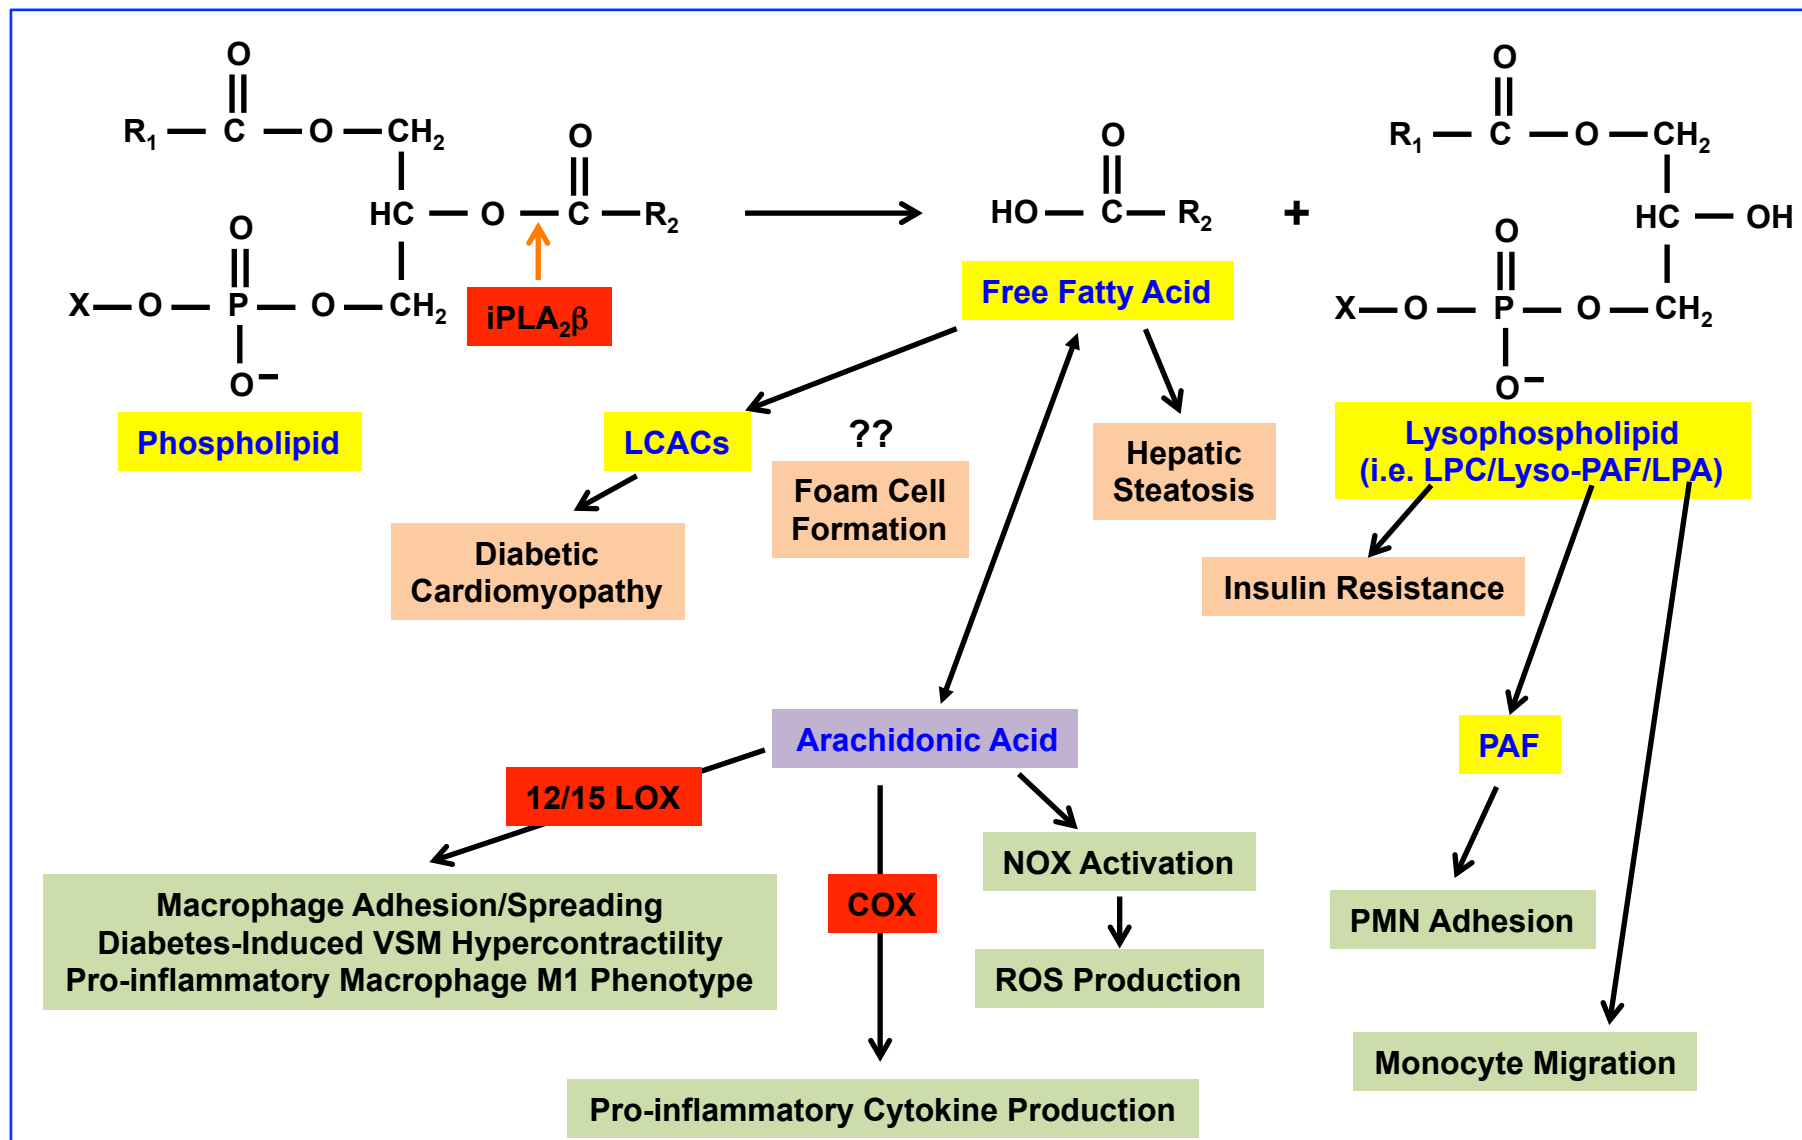

Supplement: NIHMS1511687-supplement-1.pdf [file NIHMS1511687-supplement-1.pdf]
